# Supplementary material
Source: PubMed Central journal article supplement (PMC3795464)

## Methods

### Antibodies

Rabbit polyclonal antibody against mouse filamin A (FlnA) was raised by immunizing rabbits with a recombinant, dimerized domain of mouse FlnA.<sup>1</sup> Rabbit polyclonal antibody against human  $\alpha$ IIb (SEW8) was raised by immunizing rabbits with purified human  $\alpha$ IIb, which cross-reacts with murine  $\alpha$ IIb. Mouse monoclonal antibody against Septin5 (LJ-33) was kindly provided by Dr. Jerry Ware (University of Arkansas). All other antibodies were commercially purchased and indicated in each section.

### Immunoblotting

Platelets were isolated as described previously.<sup>2</sup> Washed platelets were resuspended in modified Tyrode-HEPES (Tyrode–N-2-hydroxyethylpiperazine-N-2-ethanesulfonic acid) buffer (10mM HEPES [pH 7.4], 12mM NaHCO<sub>3</sub>, 137mM NaCl, 2.7mM KCl, 5mM glucose, 0.25% bovine serum albumin [BSA]), and then lysed with equal volumes of T-SDS buffer (50 mM Tris-Cl [pH 7.4], 2% SDS) in the presence or absence of  $\beta$ -mercaptoethanol. Platelet lysates or cell lysates were analyzed by electrophoresis in 7.5% or 4-20% SDS-polyacrylamide gels. The separated proteins were then electrophoretically transferred to polyvinylidene fluoride (PVDF) membranes (Millipore), blocked with T-SDS containing 5% BSA, and then, probed with the antibodies described above. Blots were washed three times, incubated with a horseradish peroxidase (HRP)-conjugated secondary antibody, washed again three times, developed with Super Signal® West Pico Chemiluminescent Substrate (Thermo Scientific, Cleveland, OH), and analyzed using a ImageQuant LAS 4000 (GE Healthcare Biosciences, Piscataway, NJ).

## **Flow cytometric analysis**

Platelets in whole blood were stained with PE-anti-mouse integrin  $\alpha$ IIb (CD41) monoclonal antibody (mAb) (MWreg30: Santa Cruz Biotechnology Inc, CA, USA) and then incubated with 50  $\mu$ g/ml of filipin (Sigma, St Louis, MO, USA) followed by flow cytometric analysis as previously described.<sup>3</sup> For microparticle analysis, whole blood samples were stained with PE-anti-mouse integrin  $\alpha$ IIb mAb, and FITC-Annexin V (BD Biosciences, San Jose, CA, USA). Integrin  $\alpha$ IIb-positive population was gated and further analyzed by FITC and forward-side scatter to discriminate Annexin V-positive platelets and platelet microparticles. Where indicated, blood samples were incubated with the mAbs that bind to GPVI (JAQ1; Emfret Analytics, Eibelstadt, Germany), integrin  $\beta$ 1 (MB1.2; Millipore, Billerica, MA, USA), and CD31 (MEC 13.3; BD Pharmingen, San Diego, CA, USA) then, fixed with paraformaldehyde. After washing, the samples were stained with FITC-labeled goat anti-Rat IgG (Jackson ImmunoResearch, West Grove, PA). For intracellular staining, blood cells were fixed and permeabilized with Cytotfix/Cytoperm (BD Biosciences) before staining. Fibrinogen binding was measured by staining the whole blood with PE-anti-mouse integrin  $\alpha$ IIb mAb and FITC-anti-fibrinogen polyclonal antibody (pAb) (Emfret Analytics). For platelet activation analysis, whole blood was incubated with APC-labeled fibrinogen in the presence of 10  $\mu$ g/ml of CRP. GPIb $\alpha$  shedding was evaluated using a DyLight 649-labeled mAb that specifically recognizes the N-terminal 45 kDa domain of mGPIb $\alpha$  (Xia.G5, Emfret Analytics). Platelets were gated by staining with DyLight488 labeled anti-mGPIb $\beta$  mAb (Emfret Analytics).

## **Confocal microscopy**

Washed platelets from *Abcg8*<sup>-/-</sup> mice fed with low or high plant sterol diet were settled on slides by cytopspin and fixed with 4% paraformaldehyde at 4°C for 30 minutes. The slides were

washed 3 times with PBS and then permeabilized by 0.2% Tx-100 in PBS for 15 min at room temperature. After two wash with PBS/2% FBS, platelets were incubated with rabbit anti-FlnA antibody and DyLight488 labeled anti-mGPIIb $\beta$  mAb (Emfret Analytics) followed by incubation with AlexaFluor647-labeled goat anti-rabbit IgG. Fluorescent signals were detected using confocal microscope (Olympus FV1000-MPE Multiphoton Microscope, Olympus Corporation, Tokyo, Japan) and a UPlanSApo 100 x/1.4 Oil  $\infty$  /0.17/FN26.5 objective (Olympus, Center Valley, PA).

### **Histopathology**

Four Abcg8<sup>-/-</sup> female mice at 5 weeks of age were fed moderate plant sterol diets (high plant sterol diets for 6 weeks, low plant sterol diets for 5 weeks), or high plant sterol diets for 11 weeks. Heart, brain, spleen, kidney, liver, lung, femur were collected from mice after transcardial perfusion with phosphate-buffered saline (PBS) followed by immersion-fixation in formaldehyde; and were sent to the Histology Laboratory at Charles River Laboratories International, Inc. (Wilmington, MA) for pathologic analysis. Formalin-fixed tissues were embedded in paraffin, sectioned at 5 micrometers, followed by staining with hematoxylin and eosin (H&E) and visualized on an Olympus BH2 microscope with SPlan objectives. Images were captured using an Olympus DP70 digital color camera.

### **Plasma glyocalicin determination**

Plasma glyocalicin levels in human plasma samples were measured by ELISA using mouse mAb 142.16 as the capture antibody and biotinylated 142.2 as the detection antibody. A standard curve was constructed using serial dilutions of SSC/ISTH Secondary Coagulation Standard Lot#3. Both 142.16 and 142.2 mAbs were generated in our laboratory.

## Statistics

Data are presented as mean  $\pm$  SD as indicated. Two groups were compared by the unpaired Student *t* test (Prism, GraphPad Software Inc, San Diego, CA, USA). Probability values less than 0.05 were considered statistically significant.

## Reference List

1. Kanaji T, Ware J, Okamura T, Newman PJ. GPIIb/IIIa regulates platelet size by controlling the subcellular localization of filamin. *Blood* 2012;119:2906-2913.
2. Kanaji T, Russell S, Cunningham J et al. Megakaryocyte proliferation and ploidy regulated by the cytoplasmic tail of glycoprotein IIb/IIIa. *Blood* 2004;104:3161-3168.
3. Dole VS, Matuskova J, Vasile E et al. Thrombocytopenia and platelet abnormalities in high-density lipoprotein receptor-deficient mice. *Arterioscler Thromb Vasc Biol* 2008;28:1111-1116.

**Supplemental Figure 1 - Impaired response of *Abcg8*<sup>-/-</sup> HS platelets to stimulation by thrombin and calcium ionophore.** *Abcg8*<sup>-/-</sup> LS and *Abcg8*<sup>-/-</sup> HS platelets were stimulated with thrombin (0.4 U/ml), and calcium ionophore (2 μM) in the presence of APC-labeled fibrinogen for 10 minutes at room temperature. Samples were fixed, permeabilized, and stained with anti-FlnA antibody and analyzed by flow cytometry as described in Figure 4.

**Supplemental Figure 2 - Dose-dependent effects of plant sterol accumulation in *Abcg8*<sup>-/-</sup> mouse organs.** Organs from *Abcg8*<sup>-/-</sup> mice loaded either with moderate plant sterol (MS; panels A, C, E, G, I) or high plant sterol (HS; panels B, D, F, H, J) were harvested for histologic analysis. (A, B) BM from both groups showed increased numbers of megakaryocytes (C, D) Spleens from *Abcg8*<sup>-/-</sup> MS mice showed extramedullary hematopoiesis (C) which was more prominent in *Abcg8*<sup>-/-</sup> HS (D). (E, F) Extramedullary hematopoiesis (black arrow) and hepatitis (green arrow) are observed in the livers of *Abcg8*<sup>-/-</sup> HS mice (F). (G, H) Extramedullary hematopoiesis and bone marrow emboli within pulmon-ary vessels is shown in the lung section of *Abcg8*<sup>-/-</sup> mice fed a HS diet (H). Lungs of mice fed MS diet had normal histology (G). (I, J) Myocardial degeneration and multifocal histiocytic infiltration is observed in *Abcg8*<sup>-/-</sup> mice fed a HS diet.

**Supplemental Figure 3 - Mitochondrial membrane potential ( $\Delta\Psi_m$ ) is not disrupted in sitosterolemic platelets.** Mitochondrial membrane potential ( $\Delta\Psi_m$ ) was measured using MitoTracker Red CMXRos as an indicator dye in the presence or absence of carbonyl cyanide m-chlorophenylhydrazone (CCCP), a lipid-soluble amphipathic molecule that uncouples

oxidative phosphorylation.<sup>46</sup> Note that the degree of MitoTracker staining correlated well with platelet size, but was not disproportionately altered in platelets from *Abcg8*<sup>-/-</sup> HS versus GPIIb-deficient platelets.

**Supplemental Figure 4 - Proposed mechanism for the paradoxical phenotype of bleeding and atherosclerosis in sitosterolemia.** Accumulation of phytosterols in red cell membranes results in hemolysis and anemia. Partitioning of plant sterols in the vessel wall undoubtedly contributes to the increased risk of atherosclerosis seen in sitosterolemic patients. Intercalation of plant sterols into megakaryocyte and platelet membranes has multiple disruptive effects – mostly activating in nature. Accumulated phytosterols also likely induce integrin clustering, leading to fibrinogen binding and internalization of integrin  $\alpha$ IIb $\beta$ . Calcium flux accompanying this event leads to activation of platelet calpain, which cleaves filamin – a key intracellular adaptor protein that stabilizes plasma membrane/membrane skeleton interactions during platelet biogenesis. Filamin also controls trafficking of GPIIb $\alpha$  to the plasma membrane, and positions the tyrosine kinase Syk – a key component in platelet activation downstream of collagen binding – near the ITAM tyrosines of the GPVI/FcR $\gamma$ -chain complex. Disturbing the cellular locations of these key regulatory components combines to yield platelets with impaired adhesion to VWF and collagen under condition of shear, likely explaining the bleeding diathesis seen in likely explaining the bleeding diathesis seen in sitosterolemic patients.

**Figure S1**

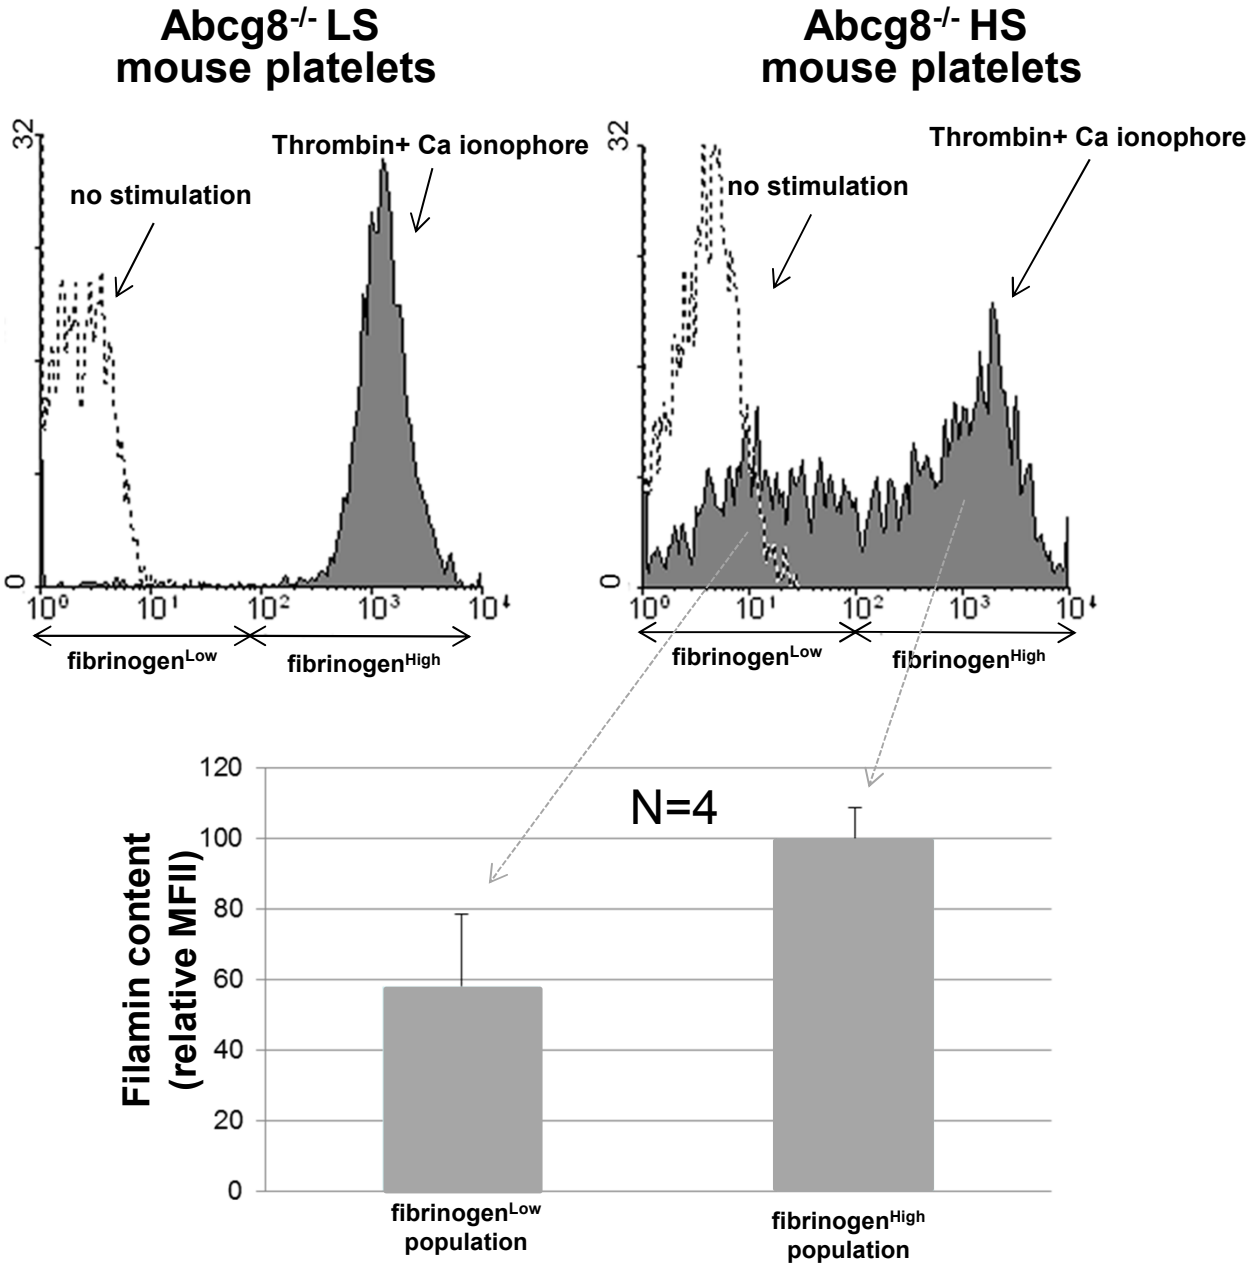

**Figure S2**

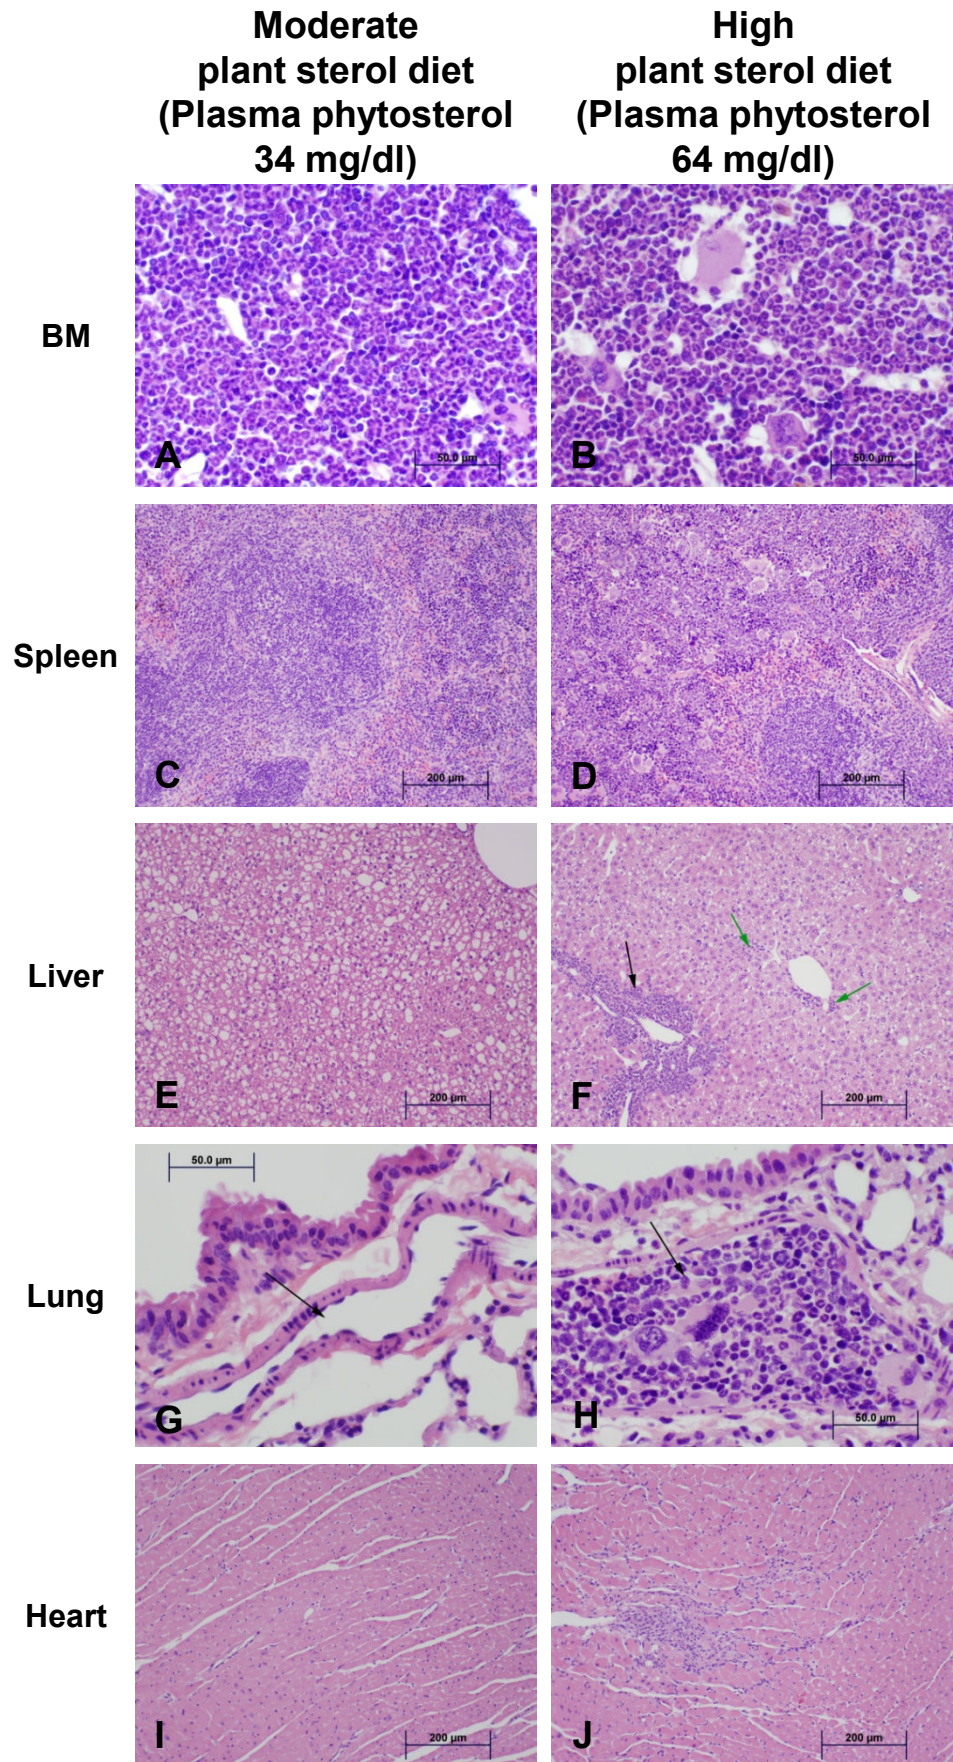



**Figure S3**

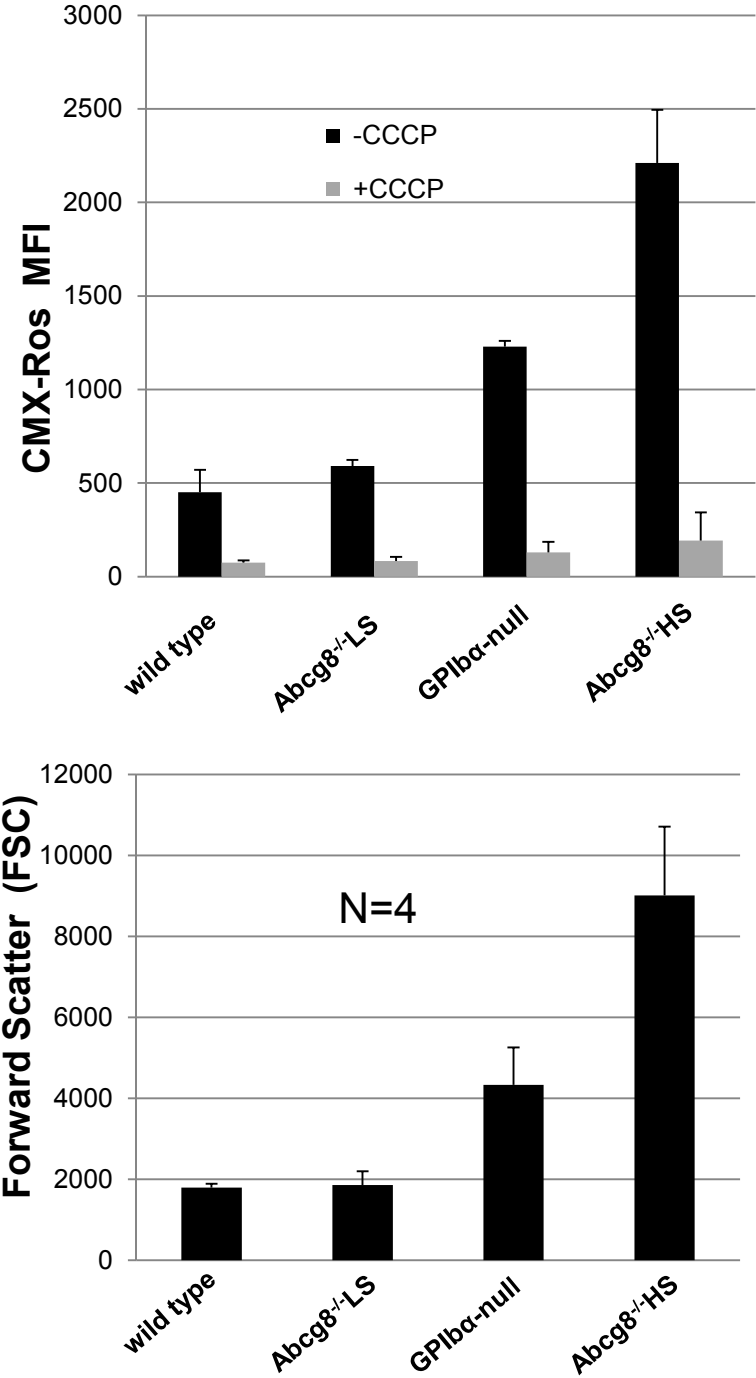

CCCP: carbonyl cyanide m-chlorophenylhydrazone - a lipid-soluble amphipathic molecule that uncouples oxidative phosphorylation

**Figure S4**

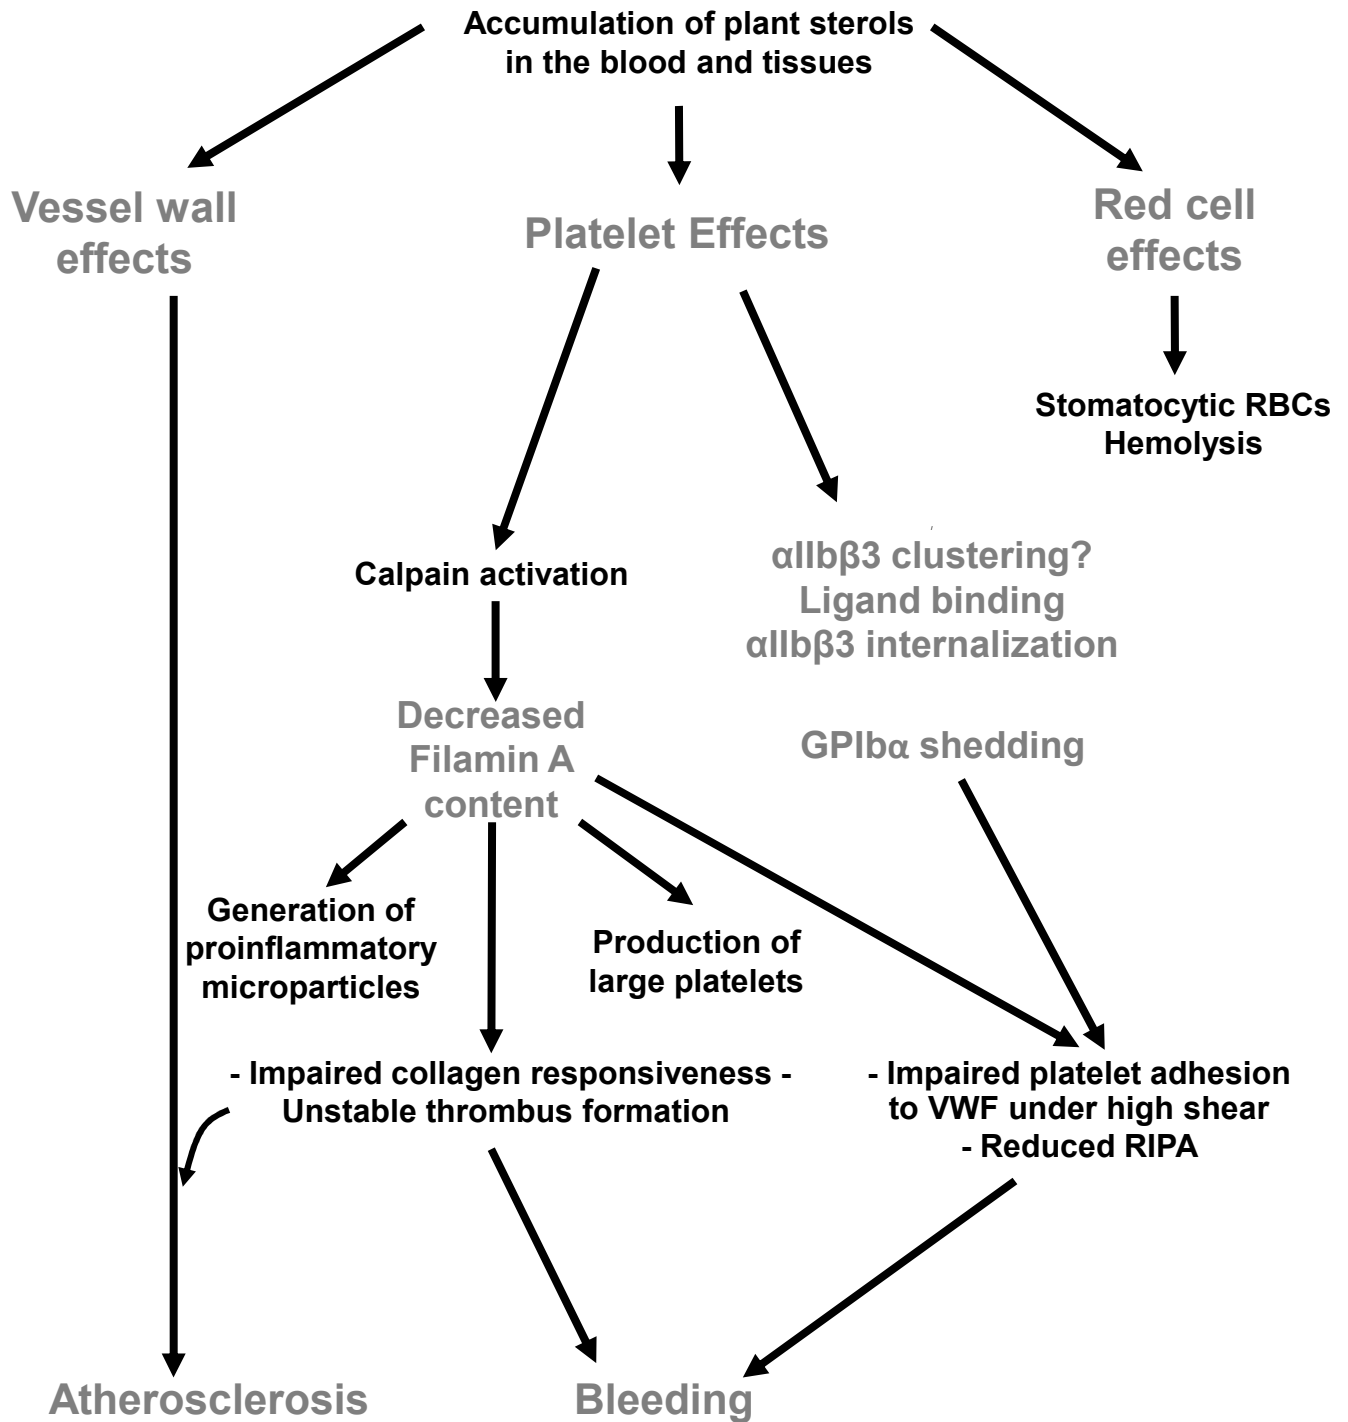

Supplement: supp_blood-2013-06-510461_Document1.pdf [file supp_blood-2013-06-510461_Document1.pdf]
